# Supplementary material
Source: PubMed Central journal article supplement (PMC7816738)
Supplement: 11427_2020_1871_MOESM2_ESM.pdf [file 11427_2020_1871_MOESM2_ESM.pdf]

Supporting information

Figure S1. Kaplan-Meier Survival Analysis in the Efficacy Analysis Set of RCT and RWS

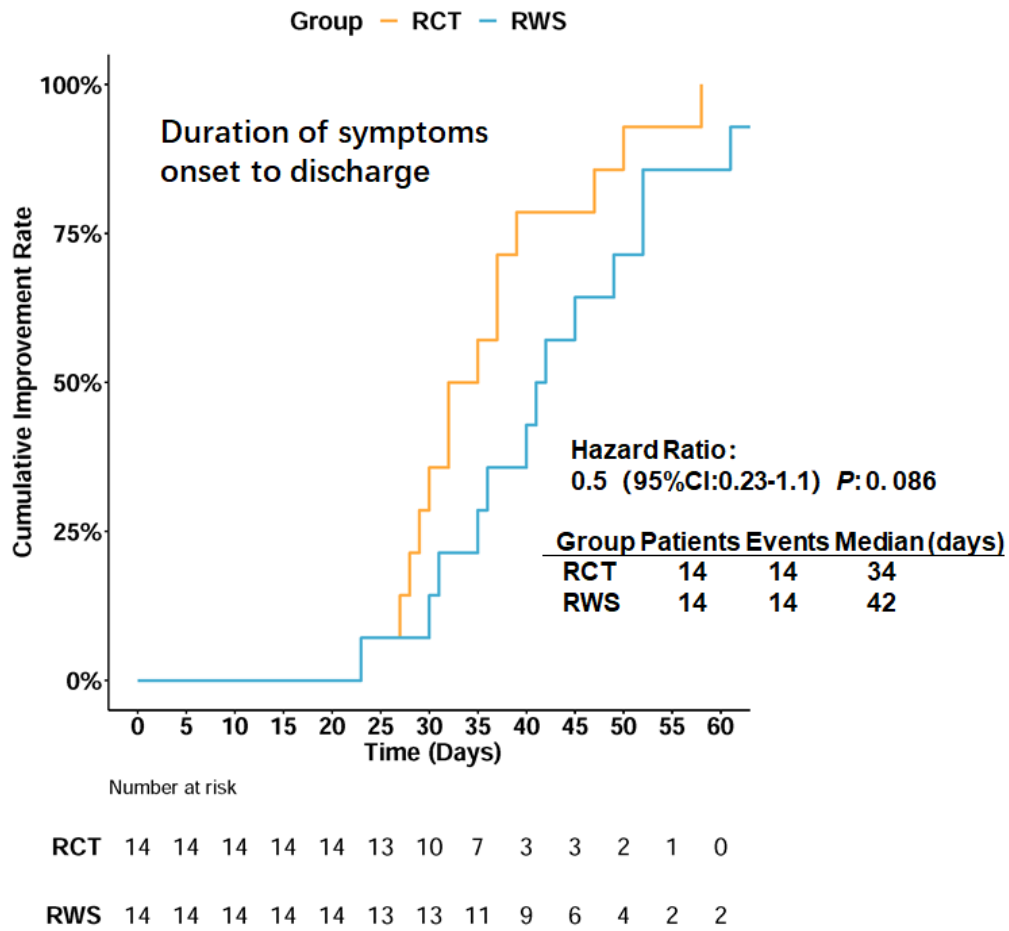

RCT : Randomized control trial; RWS: Real world study
